# Supplementary material
Source: Springer Nature journal article supplement (https://www.springermedizin.de/resource/supplementary/12874_2012_917_MOESM2_ESM.pdf/9433150)
Supplement: MOESM2 [file 9433150]

# Question

```
graph TD; Q[Question] --> L[Systematically identify relevant ("best fit") publications of frameworks, conceptual models or theories using the BeHEMOTH approach]; Q --> R[Systematically identify relevant primary research studies with qualitative evidence using the SPIDER approach]; L --> L1[Generate the a priori framework from identified publication(s) using thematic analysis]; R --> R1[Extract data on study characteristics from included studies and appraise the quality of the studies]; L1 --> C[Code evidence from included studies against the a priori framework]; R1 --> C; C --> T[Create new themes by performing thematic analysis on any evidence that cannot be coded against the framework]; T --> F[Produce new framework composed of a priori and new themes supported by the evidence]; F --> M[Revisit evidence to explore relationships between themes or concepts, thus creating a model]; M --> Test["Test" this synthesis and model by exploring the issues of dissonance and the impact of variables such as quality];
```

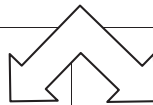

Systematically identify relevant ("best fit") publications of frameworks, conceptual models or theories using the BeHEMOTH approach

Systematically identify relevant primary research studies with qualitative evidence using the SPIDER approach

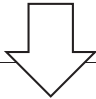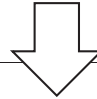

Generate the a priori framework from identified publication(s) using thematic analysis

Extract data on study characteristics from included studies and appraise the quality of the studies

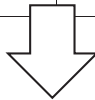

Code evidence from included studies against the a priori framework

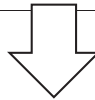

Create new themes by performing thematic analysis on any evidence that cannot be coded against the framework

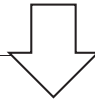

Produce new framework composed of a priori and new themes supported by the evidence

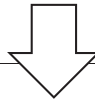

Revisit evidence to explore relationships between themes or concepts, thus creating a model

"Test" this synthesis and model by exploring the issues of dissonance and the impact of variables such as quality
